# Supplementary material for: SAMHD1 Attenuates Acute Inflammation by Maintaining Mitochondrial Function in Macrophages via Interaction with VDAC1
Source: MDPI journal article supplement (doi:10.3390/ijms24097888), 2023-04-26
Supplement: s1 [file s1]

## Supplementary Material

### SAMHD1 attenuates acute inflammation by maintaining mitochondria function in macrophages via interaction with VDAC1

Bowen Xu <sup>1,†</sup>, Han Hu <sup>1,2,†</sup>, Qianyi Sui <sup>1,†</sup>, Xiangjia Hu <sup>1</sup>, Xuchang Zhou <sup>1,3</sup>, Xiaoming Deng <sup>2,\*</sup>, Cheng Qian <sup>1,\*</sup>, Nan Li <sup>1,\*</sup>

†These authors contributed equally to this work.

\*Correspondence: Prof. Nan Li (N.L.) <sup>1,\*</sup>, nanli@immunol.org; Prof. Xiaoming Deng (X.D.) <sup>2,\*</sup>, dengphd@smmu.edu.cn; A/Prof. Cheng Qian (C.Q.) <sup>1,\*</sup>, crystalqiancheng@163.com

#### 1 Supplementary Data

Results of co-immunoprecipitation coupled to mass spectrometry (IP-MS) has been presented in two Excel files, Data Sheet 1 represents IP conducted with Control IgG antibody. Data Sheet 2 represents IP conducted with Samhd1 antibody.

#### 2 Supplementary Tables

| Primer sequences of qPCR |                          |
|--------------------------|--------------------------|
| mIL-6 Forward            | CTGCAAGAGACTTCCATCCAG    |
| mIL-6 Reverse            | AGTGGTATAGACAGGTCTGTTGG  |
| mTNF $\alpha$ Forward    | CTGAACCTTCGGGGTGATCGG    |
| mTNF $\alpha$ Reverse    | GGCTTGTCACCTCGAATTTTGAGA |
| mIFN $\beta$ Forward     | CAGCTCCAAGAAAGGACGAAC    |
| mIFN $\beta$ Reverse     | GGCAGTGTAACCTCTTCTGCAT   |
| m $\beta$ -actin Forward | GGCTGTATTCCCCTCCATCG     |
| m $\beta$ -actin Reverse | CCAGTTGGTAACAATGCCATGT   |

Supplementary Table S1. Primer sequences of qPCR

| Antibody information                                   |            |                    |
|--------------------------------------------------------|------------|--------------------|
| Samhd1 mouse mAb for WB and IF                         | ab128107   | Abcam, UK          |
| Samhd1 rabbit pAb for co-IP                            | 12586-1-AP | Proteintech, China |
| Vdac1 rabbit pAb for IF                                | 55259-1-AP | Proteintech, China |
| Vdac1 rabbit mAb for WB                                | A19707     | Abclonal, China    |
| Vdac2 rabbit mAb for WB                                | A21260     | Abclonal, China    |
| $\beta$ -Tubulin Rabbit mAb                            | A12289     | Abclonal, China    |
| Phospho-IKK $\alpha$ / $\beta$ (Ser176/180) rabbit mAb | 2697T      | CST, USA           |
| IKK $\alpha$ rabbit mAb                                | a19694     | Abclonal, China    |
| Phospho-IkBa (Ser32) (14D4) rabbit mAb                 | 2859S      | CST, USA           |
| IkBa (44D4) rabbit mAb                                 | 4812S      | CST, USA           |
| Phospho-NF- $\kappa$ B p65 (Ser536) (93H1) Rabbit mAb  | 3033S      | CST, USA           |
| NF- $\kappa$ B p65 (D14E12) XP® Rabbit mAb             | 8242S      | CST, USA           |
| Phospho-TBK1 (Ser172) (D52C2) XP® Rabbit mAb           | 5483S      | CST, USA           |
| TBK1/NAK (E8I3G) Rabbit mAb                            | 38066S     | CST, USA           |

|                                                |            |                 |
|------------------------------------------------|------------|-----------------|
| Phospho-Erk1/2 MAPK (Thr202/Tyr204) mouse mAb  | 9106S      | CST, USA        |
| p44/42 MAPK (Erk1/2) Antibody                  | 9102S      | CST, USA        |
| Phospho-p38 MAPK (Thr180/Tyr182) Antibody      | 9211S      | CST, USA        |
| p38 MAPK Antibody                              | 9212S      | CST, USA        |
| Phospho-JNK (Thr183/Tyr185) (81E11) rabbit mAb | 4668S      | CST, USA        |
| JNK2 (56G8) Rabbit mAb                         | 9258S      | CST, USA        |
| AF647 anti-mouse F4/80 Antibody for FC         | 123122     | Biolegend, USA  |
| BV421 anti-mouse/human CD11b Antibody for FC   | 101235     | Biolegend, USA  |
| FITC anti-mouse CD80 Antibody for FC           | 104706     | Biolegend, USA  |
| AF700 anti-mouse CD86 Antibody for FC          | 105122     | Biolegend, USA  |
| AF700 anti-mouse CD45.2 Antibody for FC        | 56-0454-81 | Invitrogen, USA |
| Rat Anti-Mouse CD16/CD32 Antibody              | 553141     | BD, USA         |
| PE anti-mouse CD206 (MMR) Antibody for FC      | 141706     | Biolegend, USA  |

Supplementary Table S2. Antibody information

3 Gating strategy, single controls and fluorescence-minus-one (FMO) controls of flow cytometry (FCM)

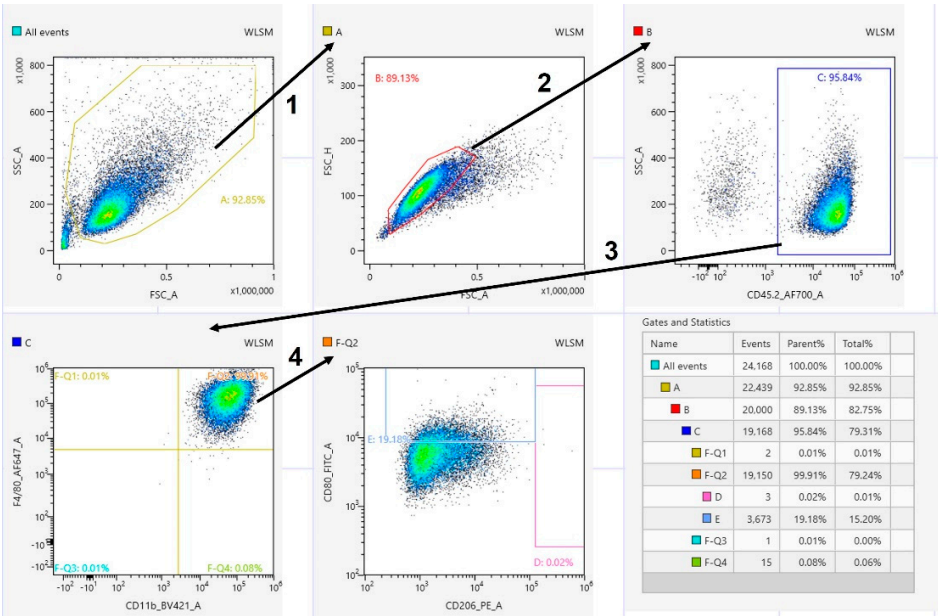

Supplementary Figure S2. Gating strategy of M1/M2 polarization FCM.

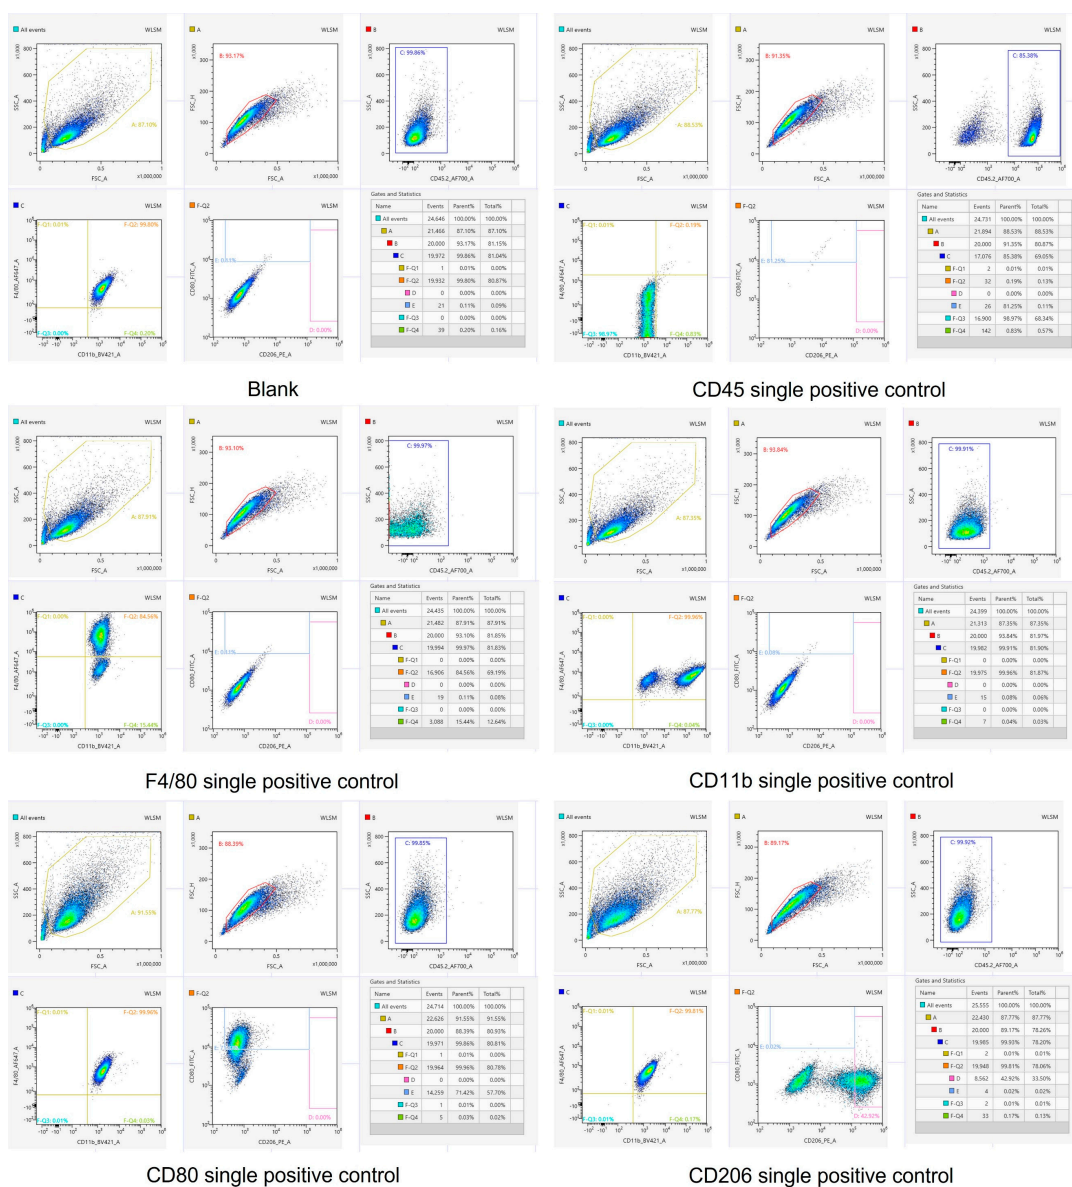

**Supplementary Figure S2. Single positive controls of M1/M2 polarization FCM.**

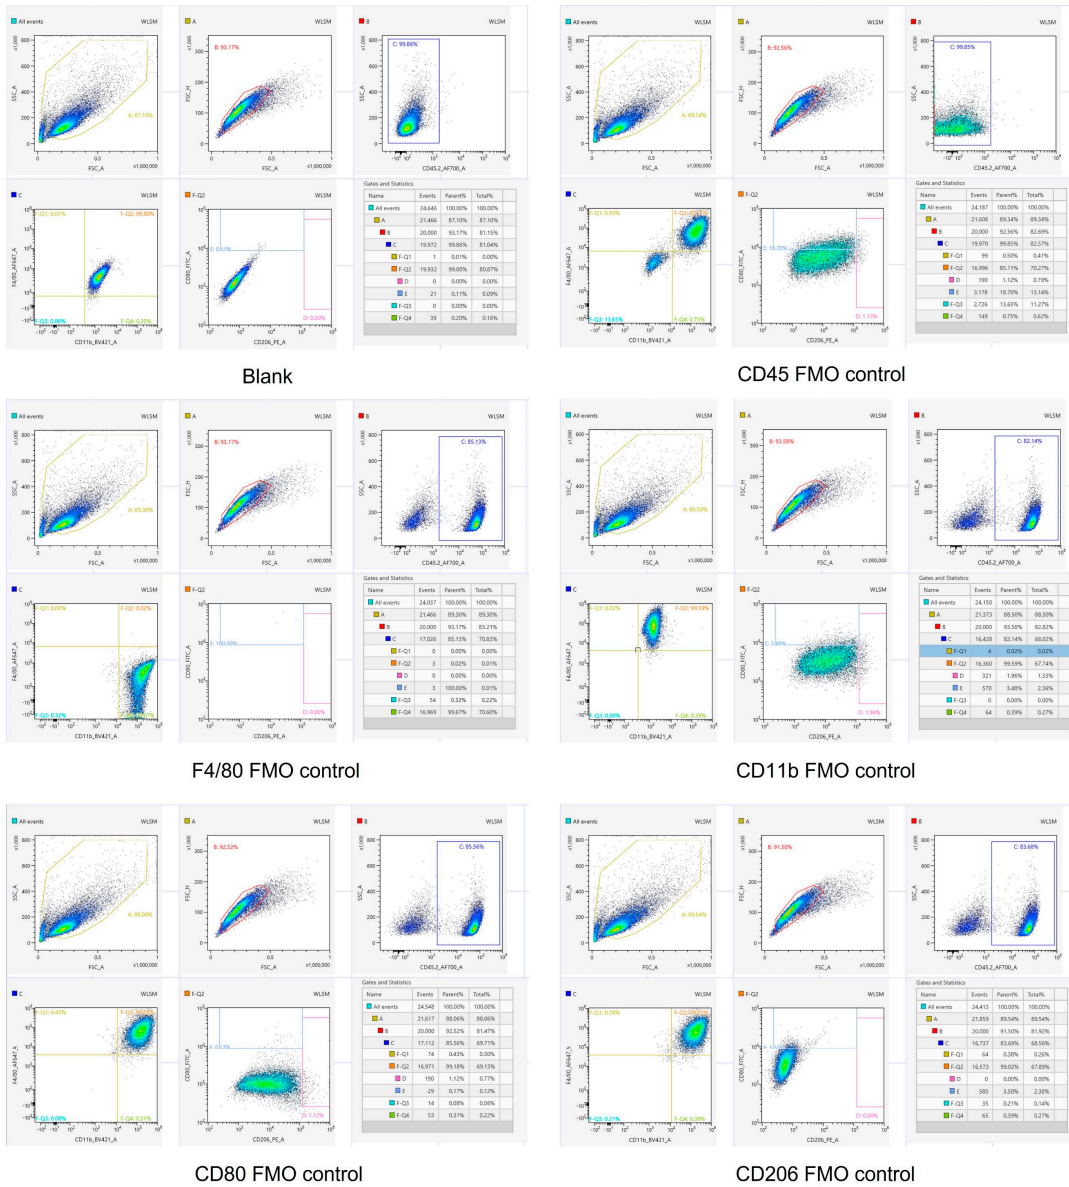

Supplementary Figure S3. FMO controls of M1/M2 polarization FCM.

#### 4 Expression efficiency of the mutant plasmids

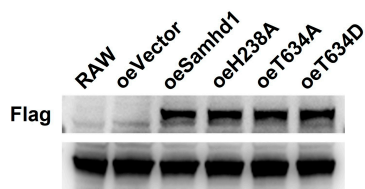

Supplementary Figure S4. Re-expression efficiency of SAMHD1 and its mutants detected by Flag tag.
